# Supplementary material for: On the utility of the azido transfer protocol: synthesis of 2- and 5-azido N-methylimidazoles, 1,3-thiazoles and N-methylpyrazole and their conversion to triazole–azole bisheteroaryls
Source: Royal Society of Chemistry journal article supplement (doi:10.1039/b500634a), 2005-01-01
Supplement: b500634a3.pdf [file b500634a3.pdf]

**Table 1.**  $^1\text{H}$ - and  $^{13}\text{C}$ -NMR shifts for the calculated (RHF/6-31G\*) **C-4'**- and **C-5'**-silylated isomers and experimental values for **4b** and **7b**.<sup>a</sup>

|             | C-3      | C-4      | C-5      | C-4'              | C-5'  | H-3  | H-4  | H-5'(4') |
|-------------|----------|----------|----------|-------------------|-------|------|------|----------|
| <b>C-4'</b> | 138.0    | 92.2     | 136.6    | 136.9             | 127.1 | 7.62 | 6.92 | 8.30     |
| <b>C-5'</b> | 137.8    | 95.3     | 139.7    | 139.8             | 131.2 | 7.59 | 7.12 | 7.77     |
| <b>4b</b>   | 138.9(d) | 101.7(d) | 141.3(s) | 131.2(d)/130.0(s) |       | 7.54 | 6.37 | 7.75     |
|             | C-2      | C-4      | C-5      | C-4'              | C-5'  | H-2  | H-4  | H-5'(4') |
| <b>C-4'</b> | 151.7    | 120.9    | 136.3    | 138.8             | 126.7 | 8.57 | 7.93 | 8.25     |
| <b>C-5'</b> | 152.3    | 120.8    | 139.6    | 138.5             | 131.0 | 8.55 | 7.90 | 7.76     |
| <b>7b</b>   | 150.8(d) | 133.8(d) | 141.6(s) | 138.1(s)/129.1(d) |       | 8.75 | 8.06 | 7.48     |

<sup>a</sup> In order to obtain as far as possible uniform and reliable chemical shifts ( $\delta$ ), the spectra were recorded for dilute solutions (ca. 10%, wt) in  $\text{CDCl}_3$  with TMS as internal standard. Supplementary material is available from ESI.
